# Supplementary material for: Engineering Adenoviral Vectors with Improved GBM Selectivity
Source: MDPI journal article supplement (doi:10.3390/v15051086), 2023-04-28
Supplement: s1 [file s1]

**Table S1.** Promoter sequences inserted into Ad5 vector expressing luciferase.

| Promoter                                                              | 5'-3' Promoter Sequence                                                                                                                                                                                                                                                                                                    |
|-----------------------------------------------------------------------|----------------------------------------------------------------------------------------------------------------------------------------------------------------------------------------------------------------------------------------------------------------------------------------------------------------------------|
| Survivin Promoter                                                     | CACGCGTTCTTTGAAAGCAG-<br>TCGAGGGGGCGCTAGGTGTGGGCAGGGAC-<br>GAGCTGGCGCGGCGTCGCTGGGTGCACCGCGACCAC<br>GGGCAGAGCCACGCGGCGGGAGGAC-<br>TACAAC TCCCGGCACACCCCGCGCCGCCCCGCCTC-<br>TACTCCCAGAAGGCCGCGGGGGGTGGACCGCCTAAG<br>AG-<br>GGCGTGCGCTCCCGACATGCCCCGCGGCGCGCCATTA<br>ACCGCCAGATTTGAATCGCGGGACCCGTTGG-<br>CAGAGGTGGCGGCGGCGGCA |
| hTERT Promoter                                                        | CTTCCACGTGGCGGAGGGACTGGGGACCCGGG-<br>CACCCGTCCTGCCCTTCAC-<br>CTTCCAGCTCCGCCTCCTCCGCGCGGACCCCGCCCCG<br>TCCCGACCCCTCCCGGGTCCCCGGCCAGCCCCCTCC<br>GGGCCCTCCCAGCCCCTCCCCTTCTTTCCGCGGCCCC<br>GCCCTCTCCTCGCGGCGCGAG-<br>TTTCAGGCAGCGCTGCGTCCTGCTGCGCACGTGGGAA-<br>GCCCTGGCCCCGGCCACCCCGCG                                         |
| Survivin/hTERT Promoter (Survivin+LUC+BHG polyA + hTERT)<br>BHG polyA | TGTGCCTTCTAGTTGCCAGCCATCTGTTGTTT-<br>GCCCC TCCCCCGTGCCTTCCTTGACCCTG-<br>GAAGGTGCCACTCCCACTGTCCTTTCCTAATAAAATGA<br>GGAAATTGCATCGCATTGTCTGAGTAGGTGTCATTC-<br>TATTCTGGGGGGTGGGGTGGGGCAG-<br>GACAGCAAGGGGGAGGATTGGGAAGACAATAGCAGG<br>CATGCTGGGGATGCGGTGGGCTCTATGGC                                                             |
